# Supplementary material
Source: HighWire-hosted journal article supplement (http://www.cmaj.ca/highwire/filestream/68318/field_highwire_adjunct_files/0/170711-case-1-at.pdf)
Supplement: 170711-case-1-at.pdf [file 170711-case-1-at.pdf]

## Appendix 1: Clinical, Laboratory and Treatment Progress of Case over Entire Hospitalization

|              |                                       | Admission       | D2              | D3-4            | D5-7 | D8-11           | D13-14 | D14-17      | D18    | D19-20                                                | D21                                                                            | D22                                                                                                           | D23 | D24  | D25 | 26-35 | 36-44                                  | 45-55 |
|--------------|---------------------------------------|-----------------|-----------------|-----------------|------|-----------------|--------|-------------|--------|-------------------------------------------------------|--------------------------------------------------------------------------------|---------------------------------------------------------------------------------------------------------------|-----|------|-----|-------|----------------------------------------|-------|
| Clinical     | Hypothermia/Fever                     | Yes             | Yes             |                 |      |                 |        |             |        | Yes                                                   |                                                                                |                                                                                                               |     |      |     |       |                                        |       |
|              | Shock                                 |                 | Yes             | Yes             | Yes  |                 |        |             |        |                                                       |                                                                                |                                                                                                               |     |      |     |       |                                        |       |
|              | Multiorgan Failure                    |                 | Yes             | Yes             | Yes  |                 |        |             |        |                                                       |                                                                                |                                                                                                               |     |      |     |       |                                        |       |
|              | Rash                                  |                 |                 |                 |      |                 | Limb s | Generalized | Fading |                                                       |                                                                                |                                                                                                               |     |      |     |       |                                        |       |
| Haematology  | Haemoglobin G/L (Normal 150-200)      | 156             |                 | 107             |      |                 |        |             |        |                                                       |                                                                                |                                                                                                               |     |      |     |       |                                        |       |
|              | White cell x109/L (Normal [5-34])     | 5.9             | 2.5             | 2.9             |      |                 | 10     | 10.4        |        |                                                       |                                                                                | 10.7                                                                                                          |     | 15.1 |     |       | 10.5                                   |       |
|              | Neutrophils x109/L (Normal [6-26])    | 4.1             | 1.2             | 0.4             |      |                 | 7      | 7.2         |        |                                                       |                                                                                | 6.4                                                                                                           |     | 10.6 |     |       | 5.7                                    |       |
|              | Platelet x109/L (Normal [150-400])    | 386             | 26              | 16              |      |                 | 124    | low         |        |                                                       |                                                                                | 155                                                                                                           |     |      |     |       |                                        |       |
| CRP          | CRP mg/L (Normal <0.5)                | 275             | 341             |                 |      |                 |        | 103.7       |        |                                                       |                                                                                |                                                                                                               |     |      |     | 43    | 11                                     |       |
| CSF          | CSF WBC x106 (Normal [0-30])          | 40*             |                 |                 |      |                 |        |             |        |                                                       |                                                                                |                                                                                                               |     |      |     |       |                                        |       |
|              | CSF Neutrophil %                      | 38              |                 |                 |      |                 |        |             |        |                                                       |                                                                                |                                                                                                               |     |      |     |       |                                        |       |
|              | CSF RBC                               | 170720*         |                 |                 |      |                 |        |             |        |                                                       |                                                                                |                                                                                                               |     |      |     |       |                                        |       |
|              | CSF Glucose mmol/L (Normal [2.2-3.9]) | 5.5             |                 |                 |      |                 |        |             |        |                                                       |                                                                                |                                                                                                               |     |      |     |       |                                        |       |
|              | CSF protein mg/L (Normal [200-400])   | 5973*           |                 |                 |      |                 |        |             |        |                                                       |                                                                                |                                                                                                               |     |      |     |       |                                        |       |
| Microbiology | Blood Culture                         | NG <sup>A</sup> | NG              |                 |      |                 |        |             | NG     |                                                       |                                                                                | NG                                                                                                            |     |      |     |       |                                        |       |
|              | ETT/BAL cultures                      |                 | NG <sup>B</sup> | NG <sup>B</sup> |      | NG <sup>B</sup> |        |             |        | <i>Legionella</i> cultures and standard cultures sent | <i>Pseudomonas</i> & <i>Cupriavidus</i> spp identified from specimen taken D19 | <i>Legionella</i> reported on sample from D19<br><i>Cupriavidus</i> & <i>Pseudomonas</i> sensitivity released |     |      |     |       | <i>Legionella</i> serotype 6 confirmed |       |

Appendix to: Barton M, McKelvie V, Campigotto A, et al. Legionellosis following water birth in a hot tub in a Canadian neonate.

CMAJ 2017. doi: 10.1503/cmaj.170711.

Copyright © 2020 The Author(s) or their employer(s).

To receive this resource in an accessible format, please contact us at [cmajgroup@cmaj.ca](mailto:cmajgroup@cmaj.ca).

|                     |                                        |                      |                             |                      |                      |       |     |                       |                       |                      |         |         |          |          |          |           |          |    |
|---------------------|----------------------------------------|----------------------|-----------------------------|----------------------|----------------------|-------|-----|-----------------------|-----------------------|----------------------|---------|---------|----------|----------|----------|-----------|----------|----|
| Chest Imaging       | CXR                                    | R Upper Lobe Opacity | RUL & Bilateral infiltrates | ARDS picture         |                      |       |     | Extensive Lung Chages |                       |                      |         |         |          |          |          | Improving |          |    |
|                     | CT scan                                |                      |                             |                      |                      |       |     |                       | Necrotizing Pneumonia |                      |         |         |          |          |          |           |          |    |
| Ventilatory support | FIO <sub>2</sub> (%)                   | 100                  | 100                         | 100                  | 70                   | 70    | 70  | 70                    | 70                    | 70                   | 60      | 50      | 35       | 35       | 35       | 35        | 30       | 30 |
|                     | PIP (cmH <sub>2</sub> O)               |                      |                             |                      |                      | 30    | 30  | 30                    | 30                    | 30                   | 28      | 28      | 27       | 27       | 25       | 23        |          |    |
|                     | PEEP (cmH <sub>2</sub> O)              |                      |                             |                      |                      | 10    | 10  | 10                    | 10                    | 10                   | 10      | 10      | 8        | 8        | 8        | 7         |          |    |
|                     | CPAP (cmH <sub>2</sub> O)              |                      |                             |                      |                      |       |     |                       |                       |                      |         |         |          |          |          |           | 7        |    |
|                     | High-flow O <sub>2</sub> cannula L/min |                      |                             |                      |                      |       |     |                       |                       |                      |         |         |          |          |          |           |          | 8  |
|                     | Conventional ventilation               |                      |                             |                      | Yes                  | Yes   | Yes | Yes                   |                       | Yes                  | Yes     | Yes     | Yes      | Yes      | Yes      | Yes       |          |    |
|                     | Oscillator                             | Yes                  | Yes                         | Yes                  |                      |       |     |                       |                       |                      |         |         |          |          |          |           |          |    |
|                     | INO                                    | INO                  | INO                         | INO                  | INO                  | INO   | INO | INO                   |                       | INO                  | INO     |         |          |          |          |           |          |    |
| Inotropes           |                                        |                      | Yes                         | Yes                  | Yes                  |       |     |                       |                       |                      |         |         |          |          |          |           |          |    |
| Antibiotic          | Ampicillin                             | Ampicillin           |                             |                      |                      |       |     |                       |                       |                      |         |         |          |          |          |           |          |    |
|                     | Cefotaxime                             | Cefotaxime           |                             |                      |                      |       |     |                       |                       |                      |         |         |          |          |          |           |          |    |
|                     | Azithro                                |                      | Azithro <sup>b</sup>        | Azithro <sup>d</sup> | Azithro <sup>d</sup> |       |     |                       |                       | Azithro <sup>e</sup> | Azithro | Azithro | Azithro  | Azithro  | Azithro  | Azithro   | Azithro  |    |
|                     | Rifampin                               |                      |                             |                      |                      |       |     |                       |                       |                      |         |         | Rifampin | Rifampin | Rifampin | Rifampin  | Rifampin |    |
|                     | Mero                                   |                      | Mero                        | Mero                 | Mero                 | Mero  |     | Mero                  | Mero                  | Mero                 | Mero    |         |          |          |          |           |          |    |
|                     | Vanco                                  |                      | Vanco                       | Vanco                | Vanco                | Vanco |     |                       | Vanco                 | Vanco                | Vanco   |         |          |          |          |           |          |    |
|                     | Piperacillin-tazobactam                |                      |                             |                      |                      |       |     |                       |                       |                      |         | Piptazo | Piptazo  | Piptazo  | Piptazo  | Piptazo   | Piptazo  |    |

Note: ARDS = acute respiratory distress syndrome, Azithro = Azithromycin, CPAP = continuous positive airway pressure, CRP = C reactive protein, CSF = cerebrospinal fluid, CT = computed tomography, CXR = chest radiograph, FIO<sub>2</sub> = fraction inspired oxygen, INO = inhaled nitric oxide, Mero = Meropenem, NG = no growth, PEEP = positive end-expiratory pressure, PIP = peak inspiratory pressure, Piptazo = piperacillin-tazobactam, RBC = red blood cell, RUL = right upper lobe, Vanco = Vancomycin, WBC = white blood cell.

\*Bloody tap accounts for high red cell count and falsely elevated CSF WBC and CSF protein.

<sup>a</sup>At admission, blood CSF and urine culture were sterile.

<sup>b</sup>ETT culture failed to identify any pathogens despite a marked inflammatory response (3+ white cells).

<sup>c</sup>Notable improvement in ventilator settings noted 48–72 hours into high-dose azithromycin and preceded commencement of piperacillin-tazobactam, before this the infant required high pressures and higher FIO<sub>2</sub> despite Meropenem. Thereafter there was continued improvement while receiving triple therapy (azithromycin, rifampin and piperacillin-tazobactam).

<sup>d</sup>Azithromycin for this initial course was given at 10 mg/kg on day 1 then at 5 mg/kg/day for a 5-day course. Earlier improvement from oscillator to conventional ventilation and improvement in hemodynamic status coincided with combination of Meropenem, vancomycin and first course of azithromycin. Once azithromycin initial course was completed no further improvement noted and later deterioration followed rash and fever.

<sup>e</sup>Azithromycin was given at 10 mg/kg/day for the entire prolonged course.
